# Supplementary material for: Soil Nutrient Content Influences the Abundance of Soil Microbes but Not Plant Biomass at the Small-Scale
Source: PubMed Central journal article supplement (PMC3956881; doi:10.1371/journal.pone.0091998), 2014-03-17

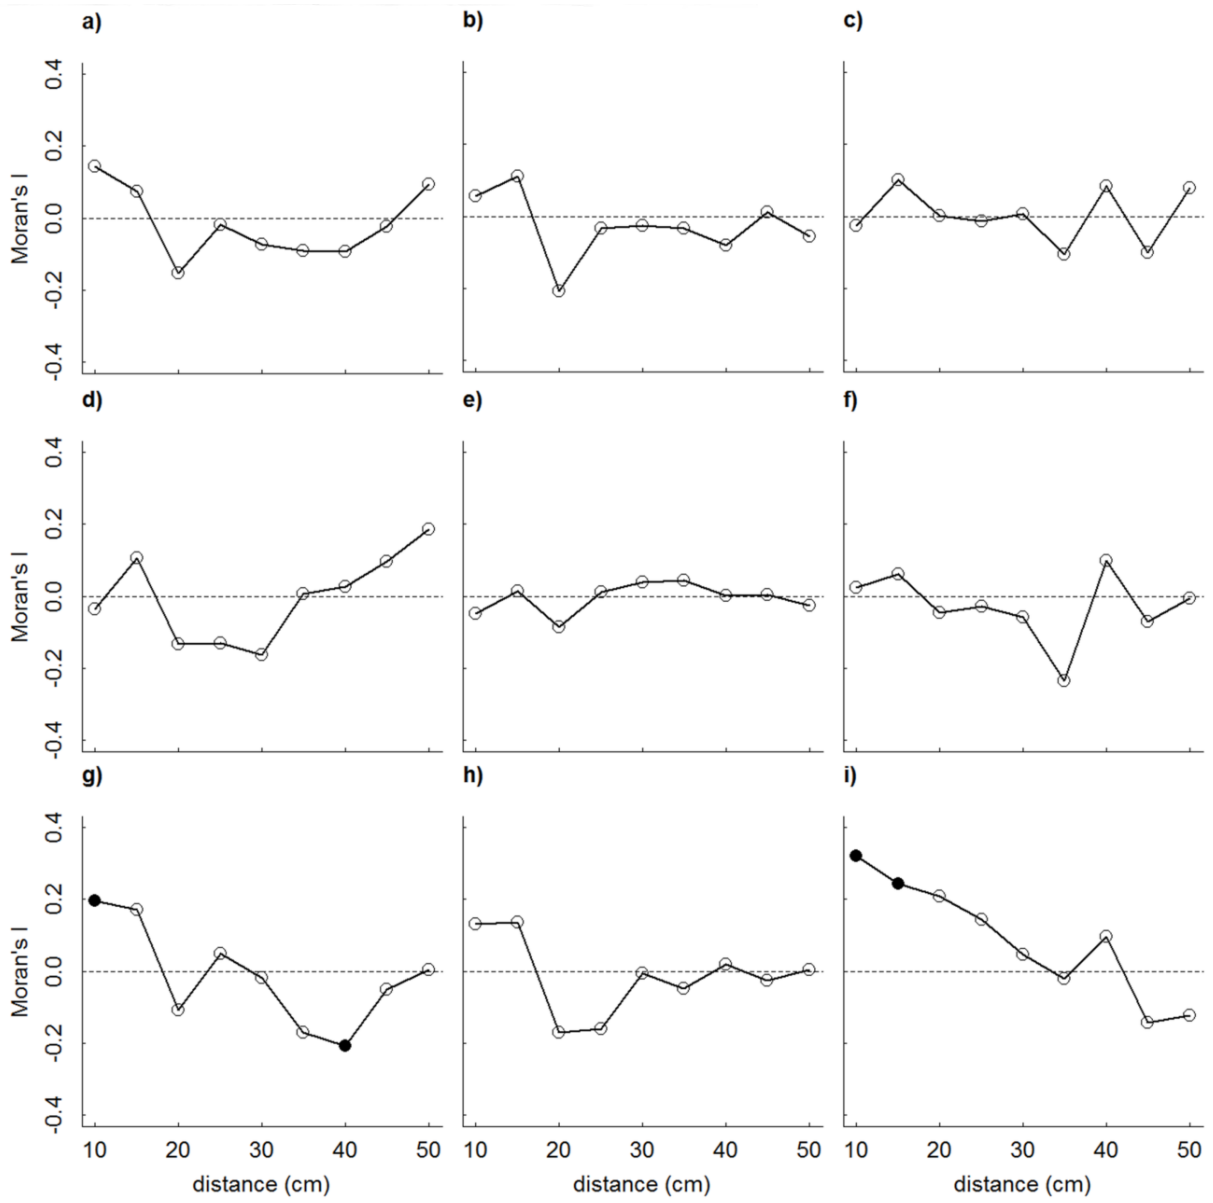

Supplement: pone.0091998.s001.pdf [file pone.0091998.s001.pdf]
