# Supplementary material for: Soil Nutrient Content Influences the Abundance of Soil Microbes but Not Plant Biomass at the Small-Scale
Source: PubMed Central journal article supplement (PMC3956881; doi:10.1371/journal.pone.0091998), 2014-03-17
Supplement: pone.0091998.s002.pdf [file pone.0091998.s002.pdf]

| Variable                                                             | May               |                | July               |                   |
|----------------------------------------------------------------------|-------------------|----------------|--------------------|-------------------|
|                                                                      | Mean ( $\pm$ SD)  | Range          | Mean ( $\pm$ SD)   | Range             |
| Nitrogen (%)                                                         | 0.26 $\pm$ 0.06   | 0.13 – 0.42    | 0.24 $\pm$ 0.07    | 0.15 – 0.43       |
| Phosphorus (mg/kg)                                                   | 19.82 $\pm$ 2.69  | 15.00 – 27.00  | 20.06 $\pm$ 2.99   | 13.00 – 28.00     |
| Potassium (mg/kg)                                                    | 96.98 $\pm$ 24.85 | 55.00 – 175.00 | 100.22 $\pm$ 20.74 | 57.00 – 159.00    |
| AM fungi (ELFA 16:1 $\omega$ 5c<br>$\mu$ g g <sup>-1</sup> soil)     | 2.05 $\pm$ 0.65   | 1.15 – 4.26    | 1.83 $\pm$ 0.42    | 1.16 – 2.95       |
| Other fungi (ELFA<br>18:2 $\omega$ 6,9 $\mu$ g g <sup>-1</sup> soil) | 1.82 $\pm$ 0.88   | 1.05 – 7.03    | 1.68 $\pm$ 0.39    | 1.02 – 3.40       |
| AM fungi : other fungi                                               | 1.18 $\pm$ 0.30   | 0.38 – 2.08    | 1.13 $\pm$ 0.24    | 0.59 – 1.67       |
| Bacteria ( $\mu$ g ELFA g <sup>-1</sup><br>soil)                     | 20.44 $\pm$ 3.42  | 15.06 – 37.79  | 19.28 $\pm$ 1.85   | 16.08 $\pm$ 25.67 |
